# Supplementary material
Source: publisher site journal article supplement (https://neobiota.pensoft.net/article/53208/download/suppl/33/)
Supplement: Supplementary file 1

**Table S2:** Correlation matrix of the ranking model.

|  |  | *ENT1* | *ENT2* | *ENT3* | *ENT4* | *ENT5* | *ENT6* | *EST1* | *EST2* | *EST3* | *EST4* |
| --- | --- | --- | --- | --- | --- | --- | --- | --- | --- | --- | --- |
| Correlation | *ENT1* | 1.000 | .603 | .670 | .615 | .470 | .293 | .408 | .154 | .389 | .216 |
| *ENT2* | .603 | 1.000 | .723 | .494 | .724 | .264 | .076 | -.115 | .034 | -.130 |
| *ENT3* | .670 | .723 | 1.000 | .479 | .587 | .124 | .125 | -.004 | .166 | -.036 |
| *ENT4* | .615 | .494 | .479 | 1.000 | .604 | .097 | .312 | -.205 | .292 | -.011 |
| *ENT5* | .470 | .724 | .587 | .604 | 1.000 | .194 | -.053 | -.281 | -.089 | -.226 |
| *ENT6* | .293 | .264 | .124 | .097 | .194 | 1.000 | -.008 | .272 | .042 | .184 |
| *EST1* | .408 | .076 | .125 | .312 | -.053 | -.008 | 1.000 | .361 | .659 | .441 |
| *EST2* | .154 | -.115 | -.004 | -.205 | -.281 | .272 | .361 | 1.000 | .059 | .802 |
| *EST3* | .389 | .034 | .166 | .292 | -.089 | .042 | .659 | .059 | 1.000 | .094 |
| *EST4* | .216 | -.130 | -.036 | -.011 | -.226 | .184 | .441 | .802 | .094 | 1.000 |
| Sig. (1-tailed) | *ENT1* |  | .000 | .000 | .000 | .000 | .014 | .001 | .128 | .002 | .055 |
| *ENT2* | .000 |  | .000 | .000 | .000 | .025 | .288 | .200 | .401 | .170 |
| *ENT3* | .000 | .000 |  | .000 | .000 | .182 | .180 | .489 | .111 | .397 |
| *ENT4* | .000 | .000 | .000 |  | .000 | .237 | .010 | .064 | .015 | .467 |
| *ENT5* | .000 | .000 | .000 | .000 |  | .076 | .348 | .018 | .257 | .047 |
| *ENT6* | .014 | .025 | .182 | .237 | .076 |  | .476 | .021 | .379 | .087 |
| *EST1* | .001 | .288 | .180 | .010 | .348 | .476 |  | .003 | .000 | .000 |
| *EST2* | .128 | .200 | .489 | .064 | .018 | .021 | .003 |  | .333 | .000 |
| *EST3* | .002 | .401 | .111 | .015 | .257 | .379 | .000 | .333 |  | .246 |
| *EST4* | .055 | .170 | .397 | .467 | .047 | .087 | .000 | .000 | .246 |  |
